# Supplementary material
Source: Springer Nature journal article supplement (https://www.springermedizin.de/resource/supplementary/12885_2011_2776_MOESM3_ESM.pdf/9461978)

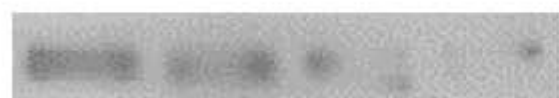

1 2 3 4

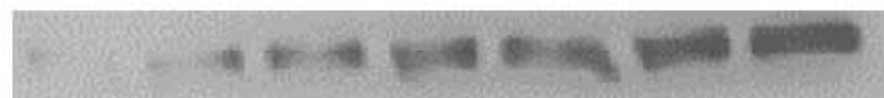

5 6 7 8 9 10 11

68 kDa

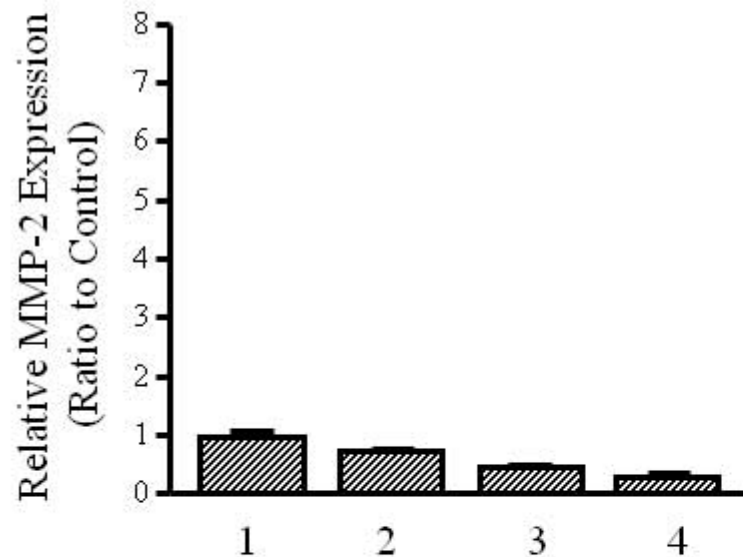

|                  |           |           |    |    |
|------------------|-----------|-----------|----|----|
| agent            | control-1 | ECI alone |    |    |
| conc. ( $\mu$ M) |           | 7         | 14 | 35 |

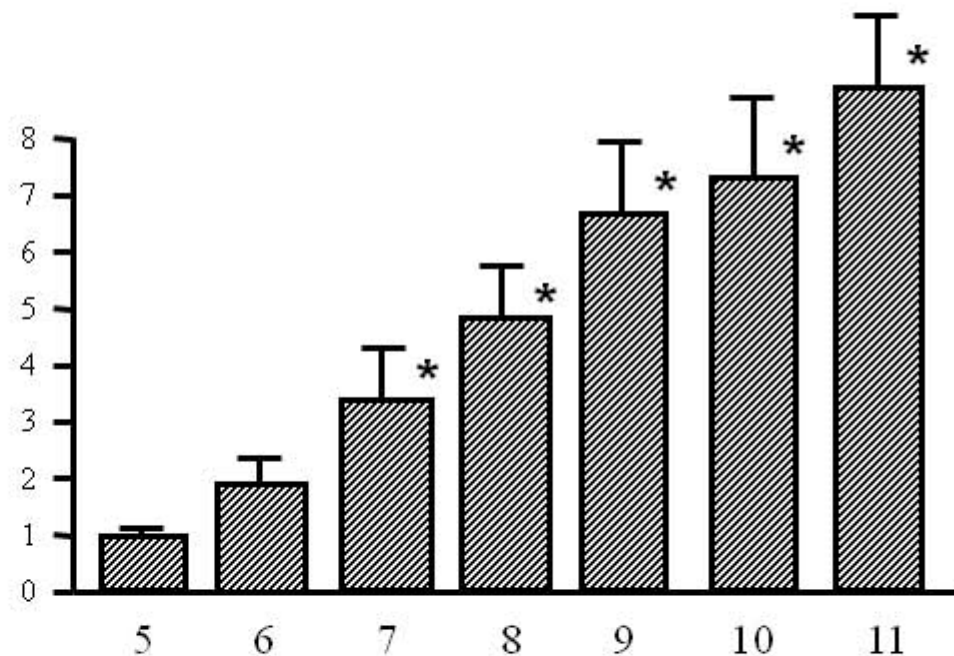

|                  |           |                           |    |    |                           |    |    |
|------------------|-----------|---------------------------|----|----|---------------------------|----|----|
| agent            | control-2 | ECI-(GlcNAc) <sub>1</sub> |    |    | ECI-(GlcNAc) <sub>2</sub> |    |    |
| conc. ( $\mu$ M) |           | 7                         | 14 | 35 | 7                         | 14 | 35 |

Supplement: MOESM3 [file 9461978]
